# Supplementary material for: Exploring dynamic protein-protein interactions in cassava through the integrative interactome network
Source: PubMed Central journal article supplement (PMC7162878; doi:10.1038/s41598-020-63536-0), 2020-04-16
Supplement: 41598_2020_63536_MOESM1_ESM.pdf [file 41598_2020_63536_MOESM1_ESM.pdf]

# Exploring dynamic protein-protein interactions in cassava through the integrative interactome network

Ratana Thanasomboon<sup>a</sup>, Saowalak Kalapanulak<sup>b,c</sup>, Supatcharee Netrphan<sup>d</sup> and Treenut Saithong<sup>b,c,\*</sup>

<sup>a</sup> Biological Engineering Program, Faculty of Engineering, King Mongkut's University of Technology Thonburi, Bangkok, 10140, Thailand

<sup>b</sup> Systems Biology and Bioinformatics Research Group, Pilot Plant Development and Training Institute, King Mongkut's University of Technology Thonburi (Bang Khun Thian), Bangkok, 10150, Thailand

<sup>c</sup> Bioinformatics and Systems Biology Program, School of Bioresources and Technology, King Mongkut's University of Technology Thonburi (Bang Khun Thian), Bangkok, 10150, Thailand

<sup>d</sup> National Center for Genetic Engineering and Biotechnology, Pathum Thani, 12120, Thailand

\* Correspondence: [treenut.sai@kmutt.ac.th](mailto:treenut.sai@kmutt.ac.th)

**Table S1** Prediction of protein-protein interactions in cassava (MePPI-In<sub>6</sub>) from known PPIs in plant templates

| Plant        | Genome information |                    | PPI Information |                    |                       | MePPI-In <sub>6</sub>    |                                                        |
|--------------|--------------------|--------------------|-----------------|--------------------|-----------------------|--------------------------|--------------------------------------------------------|
|              | Number of genes    | Number of proteins | Number of PPIs  | Number of proteins | Sources               | Number of predicted PPIs | Number of proteins corresponding to the predicted PPIs |
| Arabidopsis  | 27,416             | 35,386             | 235,215         | 17,962             | ref.21,22,43,45,58,59 | 107,235                  | 10,046                                                 |
| Rice         | 52,424             | 42,190             | 76,829          | 5,219              | ref. 23, 58           | 17,697                   | 2,089                                                  |
| Maize        | 32,540             | 63,540             | 2,762,560       | 14,000             | ref. 24, 58           | 32,894                   | 2,642                                                  |
| Potato       | 35,119             | 51,472             | 52              | 66                 | ref.58                | 17                       | 11                                                     |
| Poplar       | 41,335             | 73,013             | 8               | 10                 | ref.58                | 5                        | 7                                                      |
| Castor bean  | 25,878             | 31,221             | 10              | 10                 | ref.58                | 1                        | 1                                                      |
| Soybean      | 56,044             | 88,647             | 10              | 12                 | ref.58                | 7                        | 7                                                      |
| Tomato       | 21,121             | 34,727             | 357,946         | 10,585             | ref.25                | 97,885                   | 5,596                                                  |
| Sweet orange | 29,445             | 44,275             | 13,852          | 2,025              | ref.47                | 2,647                    | 908                                                    |
| Cassava      | 33,033             | 41,381             |                 |                    |                       | 246,242                  | 13,766                                                 |

**Table S2** List of differentially expressed transcription factors and their target genes under cold stress conditions

| Differentially expressed TF proteins |                                      |        | Starch target genes |                                           |        |
|--------------------------------------|--------------------------------------|--------|---------------------|-------------------------------------------|--------|
| Protein ID                           | Description                          | Symbol | Gene ID             | Description                               | Symbol |
| Manes.06G092600.1.p                  | Myb domain protein 96                | Myb96  | Manes.18G063500     | isoamylase 3                              | ISA3   |
| Manes.01G269700.1.p                  | bHLH DNA binding protein             | bHLH   | Manes.01G055700     | granule-bound starch synthase 1           | GBSS1  |
| Manes.06G015000.1.p                  | NAC domain containing protein        | NAC    | Manes.12G067900     | ADP glucose phosphorylase small subunit 1 | APS1-1 |
|                                      |                                      |        | Manes.13G058900     | ADP glucose phosphorylase small subunit 1 | APS1-2 |
| Manes.05G130800.2.p                  | NIN-like protein 5                   | NIN5   | Manes.15G025400     | ADP glucose phosphorylase large subunit 1 | APL1-1 |
|                                      |                                      |        | Manes.16G006900     | starch synthase 3                         | SS3    |
| Manes.16G034200.1.p                  | ERF/AP2 transcription factor protein | ERF    | Manes.13G058900     | ADP glucose phosphorylase small subunit 1 | APS1-2 |
| Manes.02G046100.1.p                  | Myb domain protein 30                | Myb30  | Manes.18G063500     | isoamylase 3                              | ISA3   |
|                                      |                                      |        | Manes.12G067900     | ADP glucose phosphorylase small subunit 1 | APS1-1 |
| Manes.06G080600.1.p                  | OBF binding protein 4                | OBF4   | Manes.01G236700     | ADP glucose phosphorylase large subunit 2 | APL2-2 |
|                                      |                                      |        | Manes.01G091700     | starch synthase 2                         | SS2-1  |

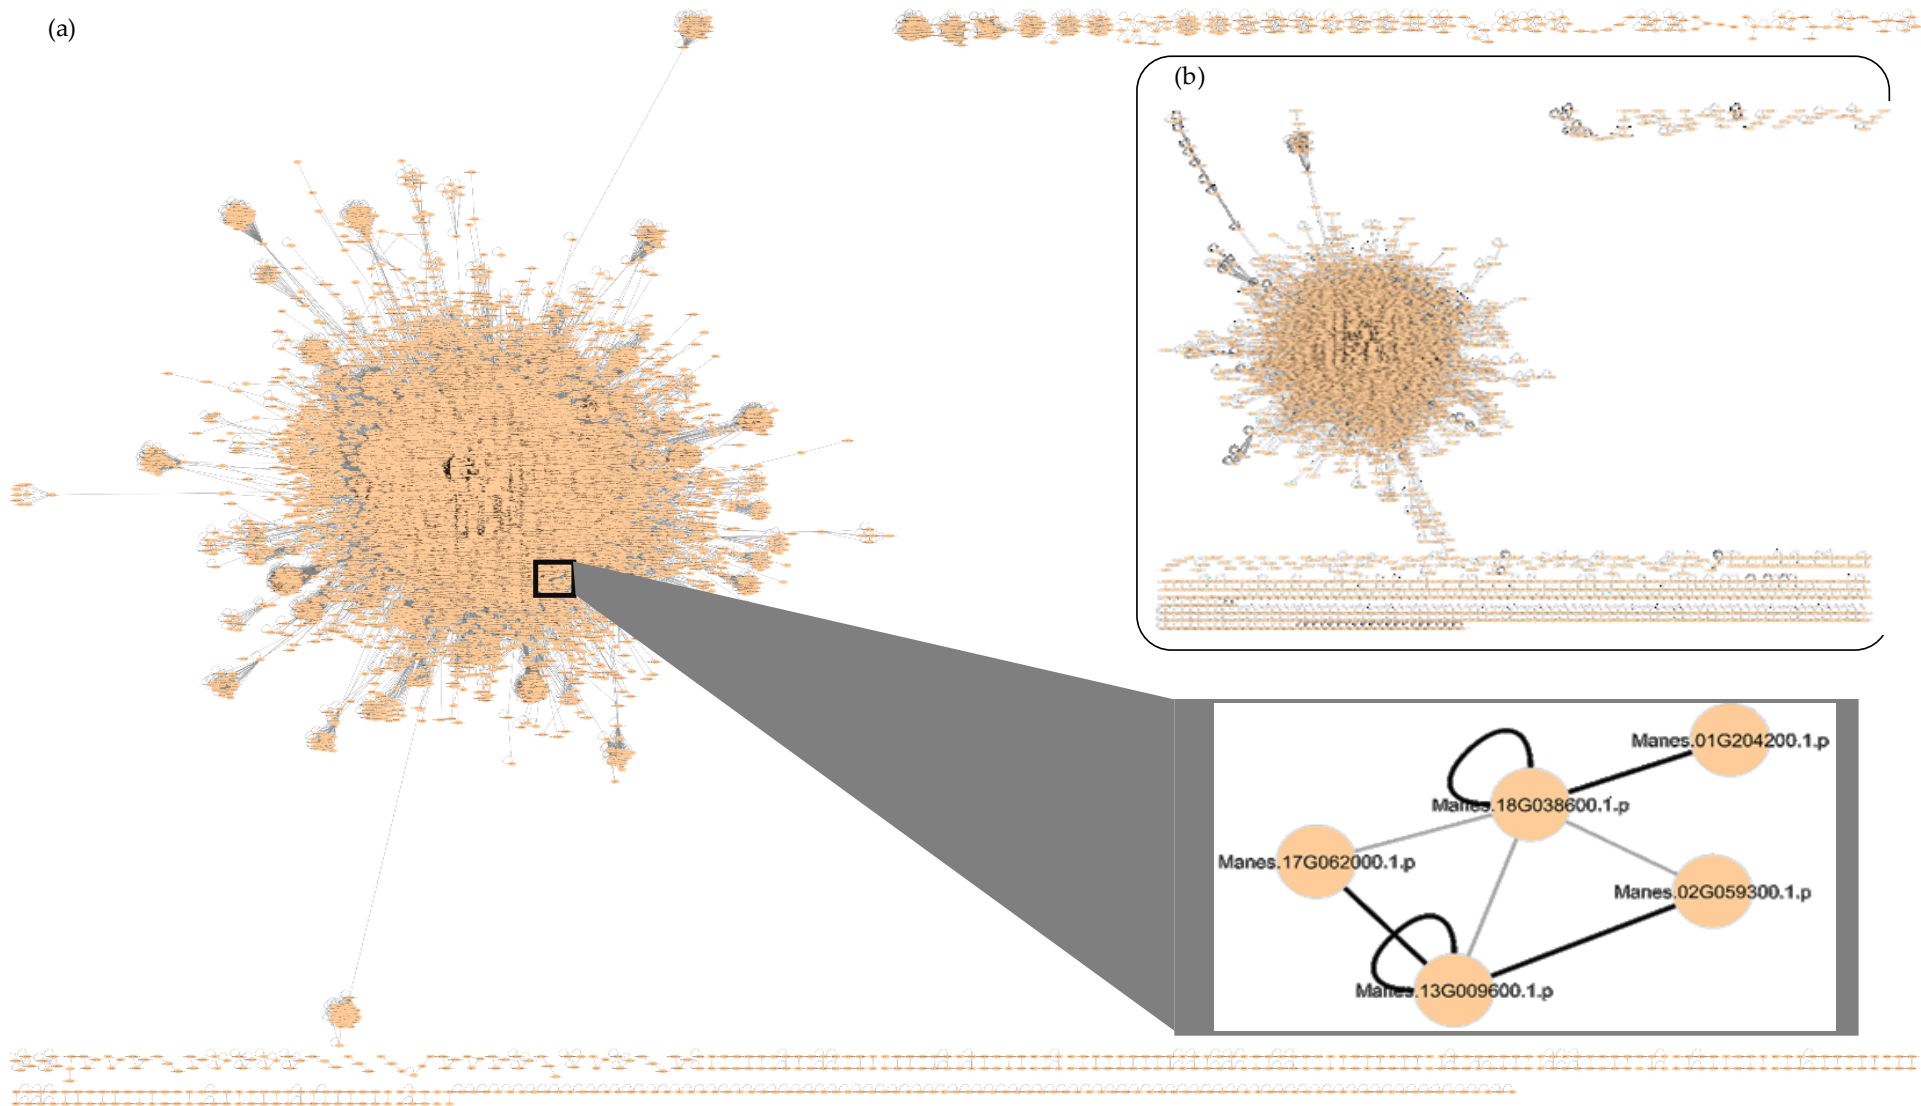

**Figure S1** The constructed protein-protein interaction network of cassava. a) The MePPI-U (this work) contained 3,638,916 interactions (edges) interconnecting 24,590 proteins (nodes). b) PPI network from Thanasomboon et al (2017) [56] consisted of 90,173 interactions with 7,209 proteins. Different colors were given to edges. The black edges represent PPIs from both interolog and DDI based prediction while the grey ones represent those from either interolog- or domain- based method.

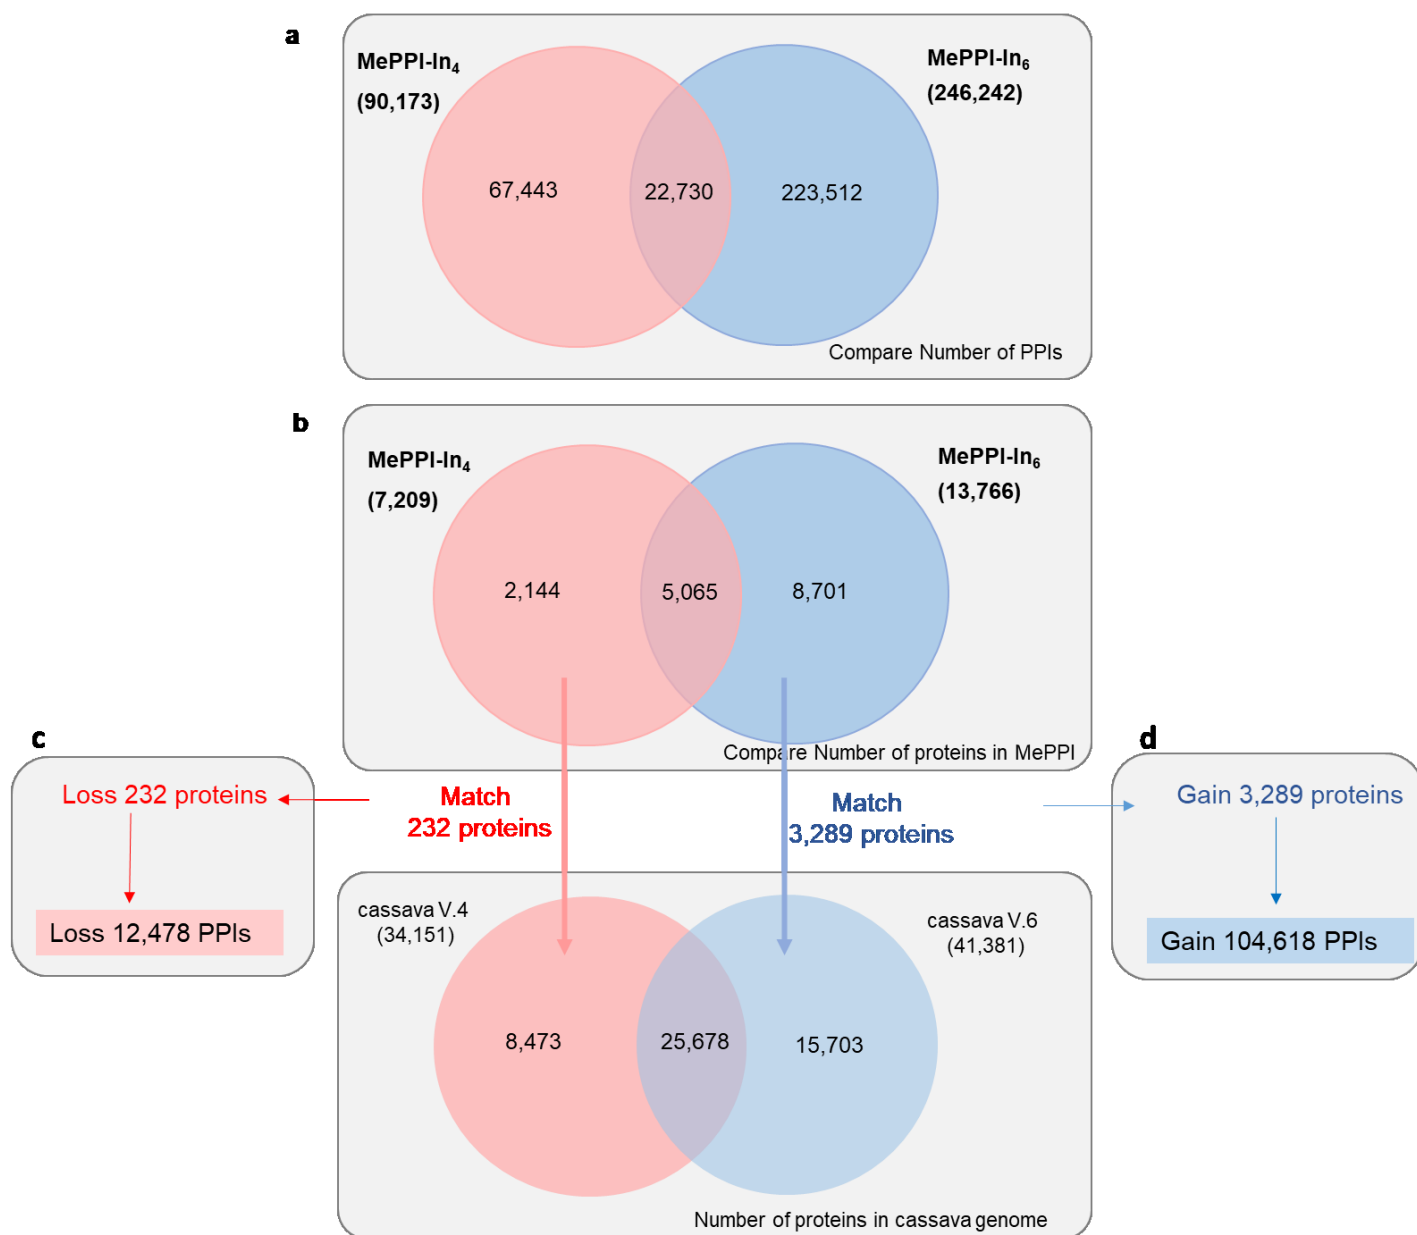

**Figure S2** Comparison of MePPI-In<sub>4</sub><sup>56</sup> and MePPI-In<sub>6</sub>. (a) represented number of PPIs from MePPI-In<sub>4</sub><sup>56</sup> and MePPI-In<sub>6</sub>. (b) showed number of proteins in MePPI-In<sub>4</sub><sup>56</sup> and MePPI-In<sub>6</sub>, which could match to unique proteins in cassava V.4 (232 proteins) and cassava V.6 (3,289 proteins). (c) and (d) showed number of PPIs in MePPI-In<sub>6</sub> which were lost and gained PPIs based on update genome version, respectively. The number of unique proteins in cassava V.4, V.6 and their interactions were presented.

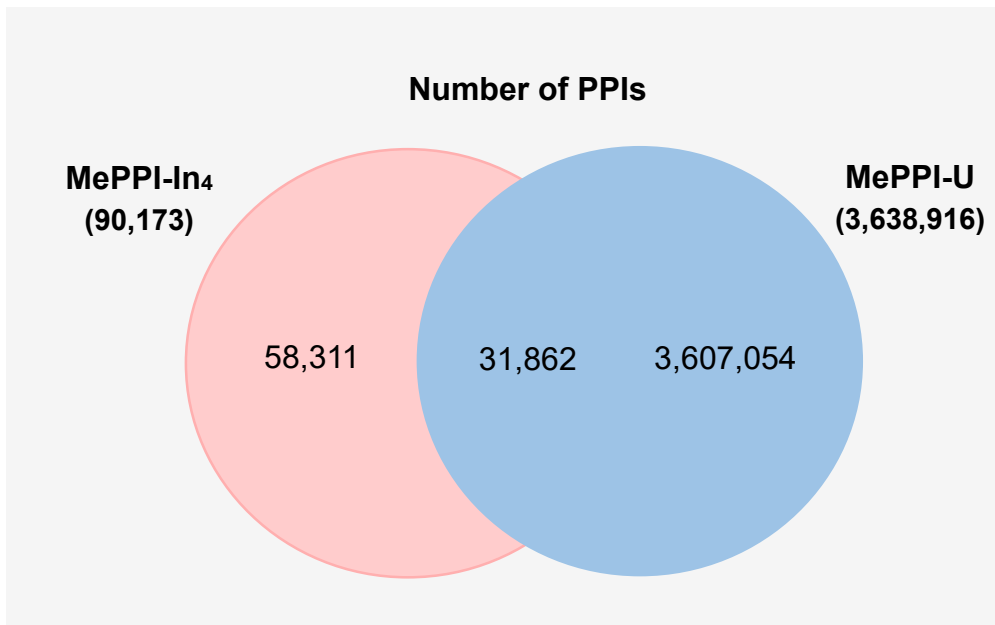

**Figure S3** Comparison of cassava PPI networks from previous work (MePPI-In<sub>4</sub>)<sup>56</sup> and current work (MePPI-U) based on PPIs comparison.

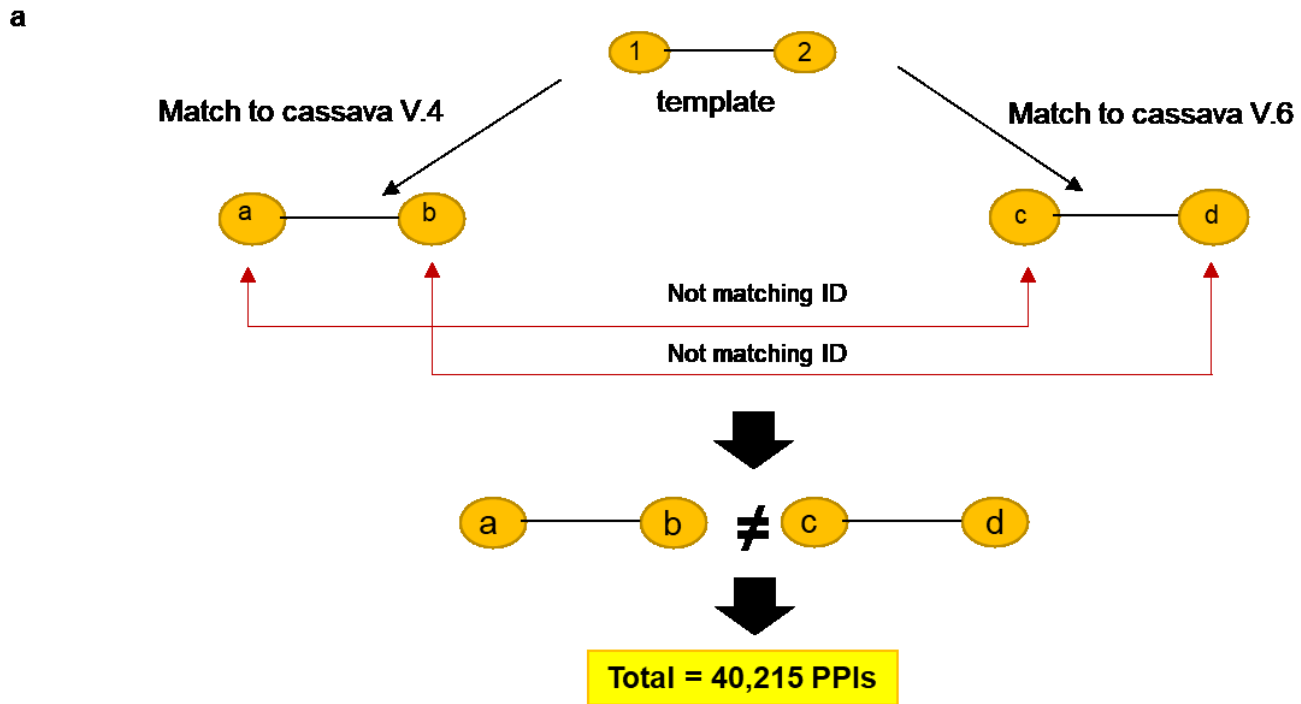

**b**

| Template Arabidopsis | Cassava V4         | Cassava V6          | Cassava V4 match V6 |
|----------------------|--------------------|---------------------|---------------------|
| AT4G10430.3          | cassava4.1_016592m | Manes.01G000300.1.p | Manes.01G000300.2.p |
| AT1G33170.1          | cassava4.1_003485m | Manes.01G000400.1.p | Manes.01G000400.2.p |
| AT5G47610.1          | cassava4.1_028743m | Manes.01G000500.1.p | Manes.01G000500.1.p |
| AT1G10830.1          | cassava4.1_009948m | Manes.01G001200.1.p | Manes.01G001200.1.p |
| AT2G41060.2          | cassava4.1_006250m | Manes.08G067200.1.p | Manes.01G001600.1.p |
| AT1G33250.1          | cassava4.1_004846m | Manes.01G001800.1.p | Manes.01G001800.2.p |

**Figure S4** Comparison of template, cassava V.4 and cassava V.6 proteins. (a) showed the schematic of matching protein from interolog-based method. Sequence re-annotation affects the homology-based analysis; updating the cassava genome from cassava V.4 to V.6 caused a mismatch of some template proteins with their counterparts in cassava, resulting in the loss of at least 40,215 putative PPIs. (b) showed the example of protein ID from template Arabidopsis, cassava V.4, cassava V.6 and cassava V.6 which were converted from cassava V.4. The color boxes represented comparison of cassava V.6 and cassava V.6 which were converted from cassava V.4; same protein ID (green) and different protein ID (red).

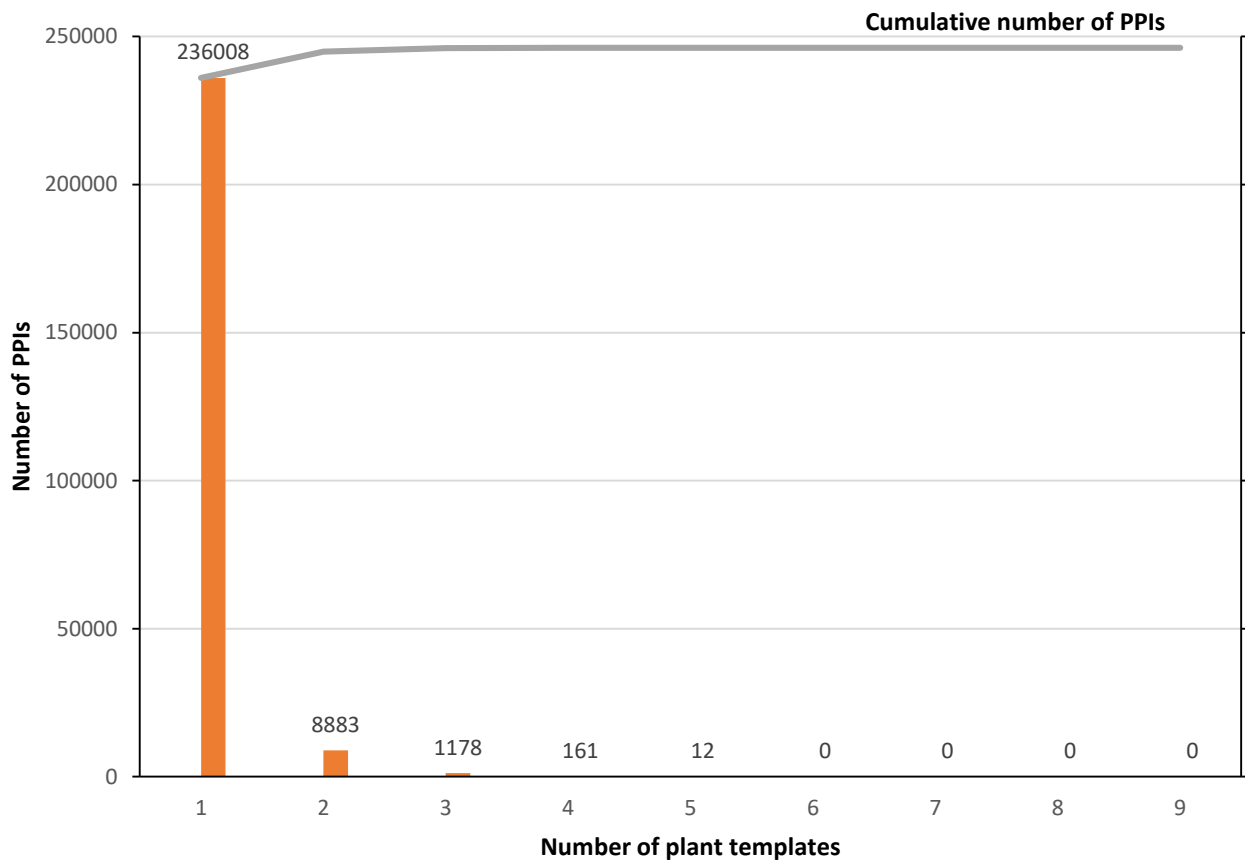

Figure S5 Number of PPIs based on number of plant templates



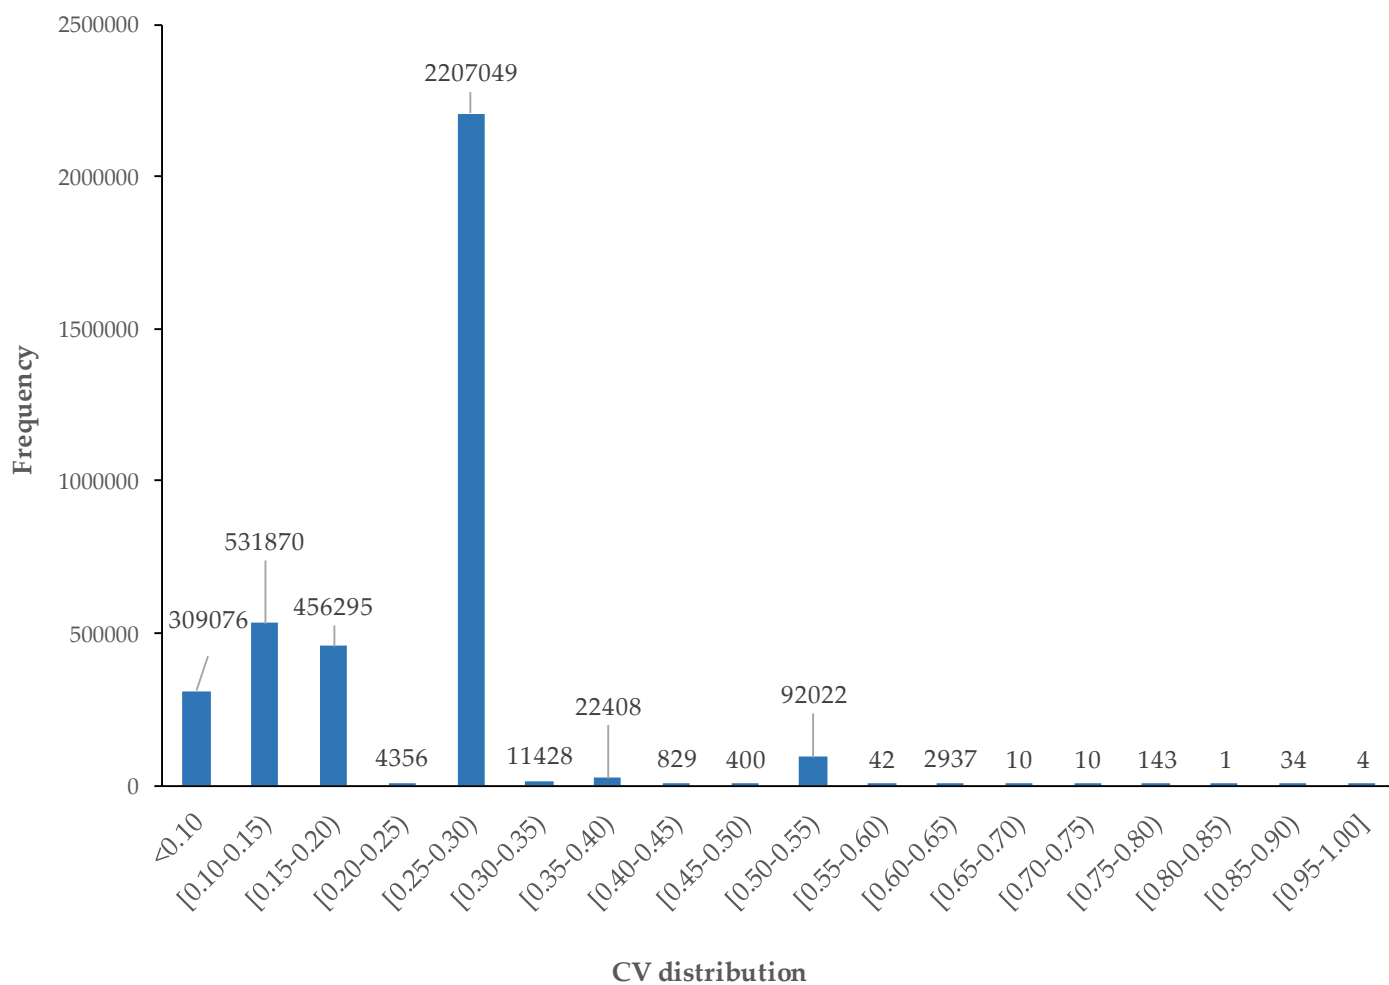

**Figure S6** Distribution of the *CV* score of predicted PPIs in MePPI-U. X-axis represented range of *CV* score and Y-axis represented number of interactions.

| Network properties                                                              | MePPI-U                                                                                                                  | MePPI-In <sub>4</sub> <sup>56</sup>                                                                                       | Arabidopsis PPI network <sup>22</sup>                                                                                     | Rice PPI network <sup>23</sup>                                                                                             |
|---------------------------------------------------------------------------------|--------------------------------------------------------------------------------------------------------------------------|---------------------------------------------------------------------------------------------------------------------------|---------------------------------------------------------------------------------------------------------------------------|----------------------------------------------------------------------------------------------------------------------------|
| <b>Dimension of network</b><br>- Number of nodes<br>- Number of edges           | 24,590<br>3,638,916                                                                                                      | 7,209<br>90,173                                                                                                           | 11,816<br>96,816                                                                                                          | 5,049<br>76,585                                                                                                            |
| <b>Scale-free property</b><br>power-law distribution<br>$P(k) \sim k^{-\gamma}$ | $y = 1488.6x^{-0.192}$<br>$r^2 = 0.83$ 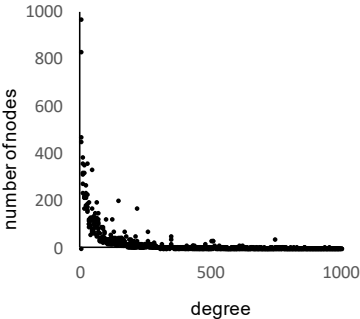 | $y = 6788.1x^{-1.534}$<br>$r^2 = 0.90$  | $y = 17188x^{-1.738}$<br>$r^2 = 0.92$  | $y = 1993.7x^{-1.277}$<br>$r^2 = 0.86$  |

**Figure S7** The global network properties of protein-protein interaction networks in cassava (MePPI-U, MePPI-In<sub>4</sub><sup>56</sup>), Arabidopsis<sup>22</sup> and rice<sup>23</sup>.

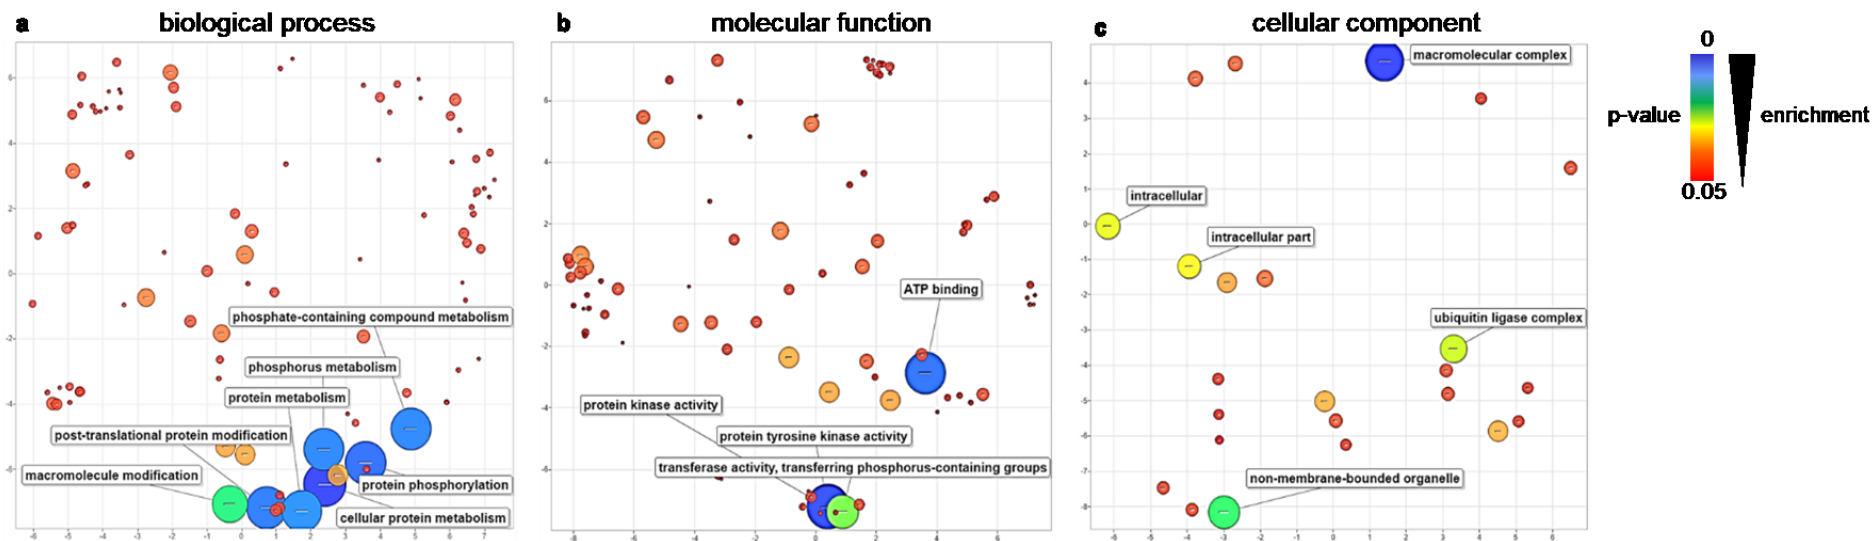

**Figure S8** The functional content of protein in MePPI-U. The scatterplots were created based on GO enrichment analysis. The node color showed degree of enrichment ranging from low (red) to high (blue), while the node size represented the frequency of the proteins in each functional group
